# Supplementary material for: A Two-Level Bioenergetic Coherence Model Integrating NAD⁺, ROS, and ATP within the ISHEA Δ±1 Framework
Source: Research Square preprint supplement (doi:10.21203/rs.3.rs-8899090/v1), 2026-02-24
Supplement: Supplementary file 1 [file cfe3276756ed7462af2e8b4a.docx]

**Supplementary Material**

*A Two-Level Bioenergetic Coherence Model Integrating NAD⁺, ROS, and ATP within the ISHEA Δ±1 Framework*

Carlos J. Perez Pulida | ISHEA Institute

# S1. Mathematical Formulation of the ISHEA Δ±1 Coherence Metric

The ISHEA Δ±1 coherence metric is defined as a bounded nonlinear function integrating redox, energetic, stress, and regulatory variables. The general form is:

**Δ = tanh(w₁·N + w₂·A + w₃·R + w₄·S + w₅·C + w₆·F + Σᵢⱼ wᵢⱼ·Xᵢ·Xⱼ)**

**Where:**

- N = normalized NAD⁺ availability [0,1]
- A = normalized ATP concentration [0,1]
- R = normalized ROS level [0,1] (inverted: high ROS → low coherence score)
- S = normalized cortisol (systemic stress marker) [0,1]
- C = CIRP — cold-inducible RNA-binding protein [0,1]
- F = FOXP3 (immune regulatory coherence proxy) [0,1]
- wᵢ = first-order weights; wᵢⱼ = second-order interaction weights

The hyperbolic tangent (tanh) function bounds Δ ∈ [−1, +1], ensuring:

- Δ → +1: Maximal coherence — optimal redox balance, low ROS, sufficient ATP
- Δ ≈ 0: Neutral or transitional bioenergetic state
- Δ → −1: System incoherence — redox failure, excessive ROS, energetic collapse

## S1.1 Optimized Weight Parameters

First-order weights derived from global sensitivity analysis (Sobol-Saltelli method, N=3,000):

| **Variable** | **First-Order Weight (wᵢ)** | **Interpretation** |
| --- | --- | --- |
| NAD⁺ (N) | w₁ = +0.65 | Dominant positive controller |
| ROS (R) | w₃ = −0.48 | Strong negative regulator |
| ATP (A) | w₂ = +0.22 | Downstream executor |
| CIRP (C) | w₅ = +0.18 | Metabolic stabilizer |
| Cortisol (S) | w₄ = −0.12 | Stress-mediated reduction |
| FOXP3 (F) | w₆ = +0.08 | Immune-regulatory proxy |

**Key interaction terms (second-order weights wᵢⱼ):**

- w(N,R) = −0.28 — NAD⁺-ROS antagonism (redox-coherence coupling)
- w(N,A) = +0.15 — NAD⁺-ATP synergy (upstream-downstream coupling)
- w(A,C) = +0.12 — ATP-CIRP functional coupling

# S2. Expanded Computational Methods

## S2.1 Sobol Global Sensitivity Analysis

Global sensitivity analysis was performed using the Sobol-Saltelli method to decompose variance in Δ into contributions from individual variables and their interactions.

**Sampling Design:**

- Sample size: N = 3,000 per matrix
- Total evaluations: (2k + 2) × N = 48,000 (k = 6 variables)
- Sampling method: Saltelli extension with quasi-random Sobol sequences
- Confidence intervals: 95% bootstrap (1,000 resamples)

**Variance Decomposition:**

Var(Δ) = Σᵢ Vᵢ + Σᵢ<ⱼ Vᵢⱼ + ... + V₁₂₃₄₅₆

**Sensitivity Indices:**

- Sᵢ = Vᵢ / Var(Δ) — first-order index (main effect)
- STᵢ = (Vᵢ + Σⱼ Vᵢⱼ + ...) / Var(Δ) — total-order index
- Difference (STᵢ − Sᵢ) quantifies interaction contributions

## S2.2 Monte Carlo Simulation Protocol

Monte Carlo simulations were performed to characterize the distribution of Δ across physiologically relevant parameter space.

- Total runs: 8,000 independent simulations
- Variable distributions: Uniform [0,1] for baseline; Beta distributions for physiological scenarios
- Correlation structure: Pearson correlation matrix imposed for NAD⁺-ROS antagonism
- Output metrics: Mean Δ, SD, 5th/95th percentiles, probability of coherence (Δ > 0.5)

# S3. Proposed Experimental Validation Roadmap

To transition from computational framework to experimental validation, the following phased research program is proposed:

## S3.1 Phase 1: In Vitro Validation (6–12 months)

### Experiment 1 — Independent NAD⁺ Manipulation

- Cell line: C2C12 myoblasts (high metabolic demand)
- Treatment: NMN supplementation (1 mM) vs. NAD⁺ depletion (FK866)
- Measurements: [NAD⁺]/[NADH], [ATP]/[ADP], ROS (DHE), mitochondrial membrane potential
- Hypothesis: NAD⁺ restoration improves Δ even without ATP increase

### Experiment 2 — ROS Coherence Threshold

- Treatment: Graded antimycin A (0–100 nM) to titrate ROS
- Measurements: H₂O₂ production, lipid peroxidation, protein carbonylation, cellular viability
- Hypothesis: Δ exhibits biphasic response — hormetic ROS vs. pathological ROS

## S3.2 Phase 2: In Vivo Validation (12–24 months)

- Animal model: C57BL/6 mice under metabolic stress (high-fat diet or exhaustive exercise)
- Groups: (1) Control, (2) NMN supplementation, (3) Creatine, (4) NMN + Antioxidants
- Measurements: Tissue NAD⁺, ATP, ROS, mitochondrial function, exercise capacity
- Hypothesis: Group 4 (redox-first strategy) shows superior Δ vs. Group 3 (ATP-only)

## S3.3 Phase 3: Human Translational Study (24–36 months)

- Design: Randomized, double-blind, placebo-controlled
- Population: Healthy adults (n=60), aged 50–70
- Intervention: Nicotinamide riboside (1,000 mg/day) × 12 weeks
- Measurements: Blood NAD⁺, ROS biomarkers, ATP (PBMCs), VO₂max, muscle biopsy (subset)
- Primary outcome: Change in composite Δ score

*End of Supplementary Material*
